# Supplementary material
Source: PubMed Central journal article supplement (PMC4988914)

**Supplemental Figure 1:** Representative histograms of fibroblasts and MSCs stained with fluorophore-conjugated antibodies for different cell surface markers. Isotype controls are in gray.

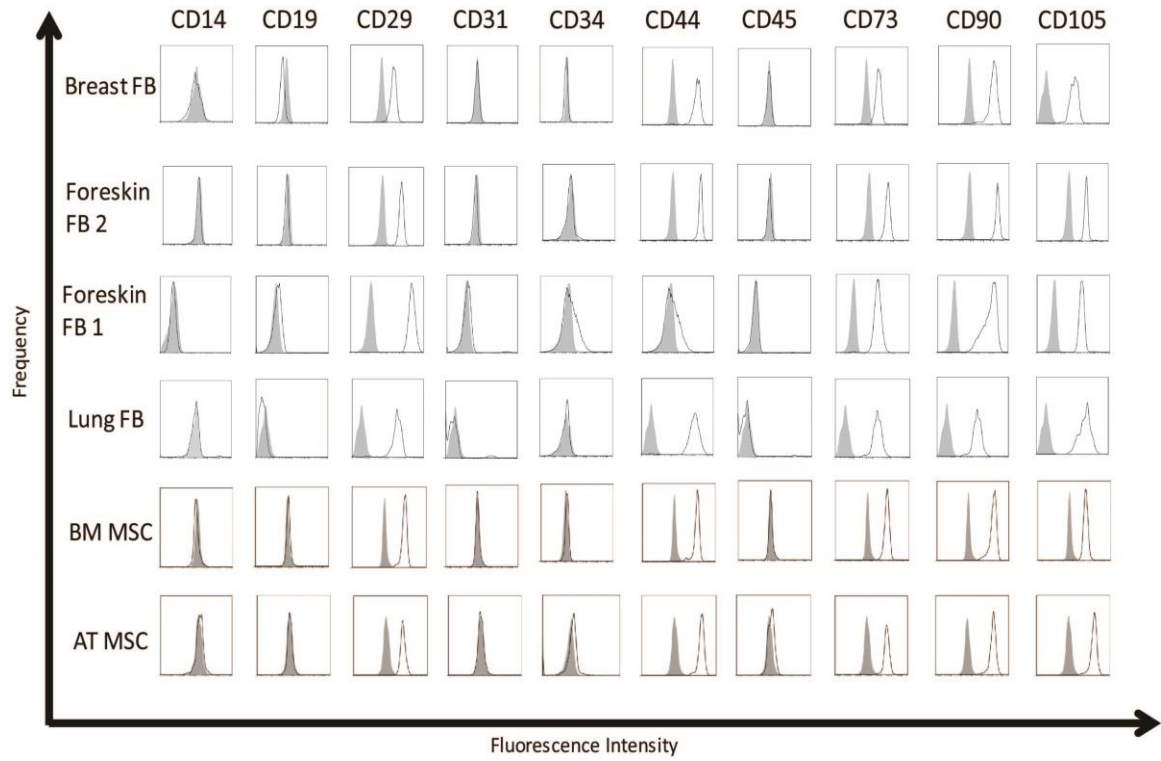

**Supplemental Figure 2: MSCs and fibroblasts both express FSP1.**

Western blot analysis of FSP1. Alpha-tubulin was used as a loading control.

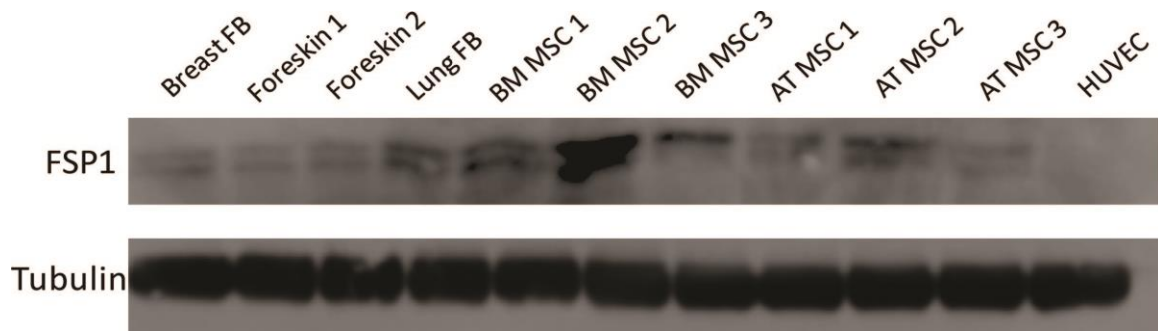

Supplement: NIHMS788565-supplement-supplement_1.pdf [file NIHMS788565-supplement-supplement_1.pdf]
